1 **Etiology of fever in Ugandan children: identification of microbial pathogens using**  
2 **metagenomic next-generation sequencing and IDseq, a platform for unbiased metagenomic**  
3 **analysis**

4  
5 Akshaya Ramesh<sup>1, 2, † \*</sup>, Sara Nakielny<sup>3 \*</sup>, Jennifer Hsu<sup>4</sup>, Mary Kyohere<sup>5</sup>, Oswald

6 Byaruhanga<sup>5</sup>, Charles de Bourcy<sup>6</sup>, Rebecca Egger<sup>6</sup>, Boris Dimitrov<sup>6</sup>, Yun-Fang Juan<sup>6</sup>, Jonathan

7 Sheu<sup>6</sup>, James Wang<sup>6</sup>, Katrina Kalantar<sup>3</sup>, Charles Langelier<sup>4</sup>, Theodore Ruel<sup>7</sup>, Arthur

8 Mpimbaza<sup>8</sup>, Michael R. Wilson<sup>1, 2</sup>, Philip J. Rosenthal<sup>4</sup>, Joseph L. DeRisi<sup>3, 6 †</sup>

9

10 \* - These authors contributed equally to this work

11 † - Corresponding authors

12

13 1 – Weill Institute for Neurosciences, University of California, San Francisco, CA, USA

14 2 – Department of Neurology, University of California, San Francisco, CA, USA

15 3 – Department of Biochemistry and Biophysics, University of California, San Francisco, CA,

16 USA

17 4 – Division of Infectious Diseases, Department of Medicine, University of California, San

18 Francisco, CA, USA

19 5 – Infectious Diseases Research Collaboration, Kampala, Uganda

20 6 – Chan Zuckerberg Biohub, San Francisco CA

21 7 – Division of Pediatric Infectious Diseases and Global Health, Department of Pediatrics,  
22 University of California, San Francisco, CA, USA

23 8 – Child Health and Development Centre, Makerere University, Kampala, Uganda

24

25 **e-mail address for authors:**

26 Akshaya Ramesh: Akshaya.Ramesh@ucsf.edu

27 Sara Nakielny: ucsfsara@gmail.com

28 Jennifer Hsu: Jennifer.Hsu@kp.org

29 Mary Kyohere: pk\_marx@yahoo.com

30 Oswald Byaruhanga: byaruos@gmail.com

31 Charles de Bourcy: cdebourcy@chanzuckerberg.com

32 Rebecca Egger: regger@chanzuckerberg.com

33 Boris Dimitrov: bdimitrov@chanzuckerberg.com

34 Yun-Fang Juan: yunfang@chanzuckerberg.com

35 Jonathan Sheu: jsheu@chanzuckerberg.com

36 James Wang: jwang@chanzuckerberg.com

37 Katrina Kalantar: kkalantar@berkeley.edu

38 Charles Langelier: Chaz.Langelier@ucsf.edu

39 Theodore Ruel: Theodore.Ruel@ucsf.edu

40 Arthur Mpimbaza: arthurwakg@yahoo.com

41 Michael R. Wilson: Michael.Wilson@ucsf.edu

42 Philip J. Rosenthal: Philip.Rosenthal@ucsf.edu

43 Joseph L. DeRisi: [joe@derisilab.ucsf.edu](mailto:joe@derisilab.ucsf.edu)

44 **Abstract**

45 **Background:** Febrile illness is a major burden in African children, and non-malarial causes of  
46 fever are uncertain. We built and employed IDseq, a cloud-based, open access, bioinformatics  
47 platform and service to identify microbes from metagenomic next-generation sequencing of  
48 tissue samples. In this pilot study, we evaluated blood, nasopharyngeal, and stool specimens  
49 from 94 children (aged 2-54 months) with febrile illness admitted to Tororo District Hospital,  
50 Uganda.

51  
52 **Results:** The most common pathogens identified were *Plasmodium falciparum* (51.1% of  
53 samples) and parvovirus B19 (4.4%) from blood; human rhinoviruses A and C (40%),  
54 respiratory syncytial virus (10%), and human herpesvirus 5 (10%) from nasopharyngeal swabs;  
55 and rotavirus A (50% of those with diarrhea) from stool. Among other potential pathogens, we  
56 identified one novel orthobunyavirus, tentatively named Nyangole virus, from the blood of a  
57 child diagnosed with malaria and pneumonia, and Bwamba orthobunyavirus in the nasopharynx  
58 of a child with rash and sepsis. We also identified two novel human rhinovirus C species.

59  
60 **Conclusions:** This exploratory pilot study demonstrates the utility of mNGS and the IDseq  
61 platform for defining the molecular landscape of febrile infectious diseases in resource limited  
62 areas. These methods, supported by a robust data analysis and sharing platform, offer a new tool  
63 for the surveillance, diagnosis, and ultimately treatment and prevention of infectious diseases.

64  
65 **Keywords:** Metagenomic Next-Generation Sequencing, Febrile illness, surveillance, pathogen  
66 discovery, IDseq, cloud computing

## 67 **Introduction**

68           The evaluation of children with fever is challenging, particularly in the developing world.  
69    A febrile child in sub-Saharan Africa may have a mild self-resolving viral infection or may be  
70    suffering bacterial sepsis or malaria—major causes of disability and death [1], [2]. In the past,  
71    febrile illness in children under five years of age in most of Africa was treated empirically as  
72    malaria due to the limited availability of diagnostics and the risk of untreated malaria progressing  
73    to life-threatening illness. This strategy changed with new guidelines from the World Health  
74    Organization (WHO) in 2010, which recommend limiting malaria therapy to those with a  
75    confirmed diagnosis [3]. However, standard recommendations for management of febrile  
76    children who do not have malaria are lacking. Increased knowledge about the prevalence of non-  
77    malarial pathogens associated with fever is needed to inform management strategies for febrile  
78    children who do not have malaria [2].

79  
80           Advances in genome sequencing hold promise for addressing global infectious disease  
81    challenges by enabling unbiased detection of microbial pathogens without requirement for the  
82    extensive infrastructure of modern microbiology laboratories [4], [5]. Although sequence-based  
83    diagnostics have not yet replaced most traditional microbiological assays, this situation is  
84    rapidly changing, as sequence-based strategies are incorporated for clinical care [6]–[10], and  
85    costs have declined dramatically over the past decade [11]. A significant roadblock toward  
86    implementation of sequence-based diagnostics is the extensive computational requirements and  
87    bioinformatics expertise required. In fact, as sequencing costs decline, computational expenses  
88    may proportionally increase due to inevitable expansion of existing genomic databases.

89

90 To address these challenges, we developed IDseq, a cloud-based open-source  
91 bioinformatics platform and service for detection of microbial pathogens from metagenomic  
92 next-generation sequencing (mNGS) data. IDseq requires minimal computational hardware and  
93 is designed to enhance accessibility and build informatics capacity in resource limited regions.  
94 Here, we leveraged IDseq and mNGS data to perform an exploratory proof-of-concept molecular  
95 survey of febrile children in rural Uganda to characterize pathogens associated with fever,  
96 including both well-recognized and novel causes of illness.

97

## 98 **Analyses/Results**

### 99 **Clinical presentations of children providing samples for analysis**

100 From October to December, 2013, 94 children admitted to Tororo District Hospital were  
101 enrolled (Table 1). Their mean age was 16.4 (IQR: 8.0-12.0) months, and 66 (70.2%) were  
102 female. Chief symptoms reported in addition to fever were cough (88.3%), vomiting (56.4%),  
103 diarrhea (47.9%), and convulsions (27.7%). Top admitting diagnoses were respiratory tract  
104 infection (57.4%), gastroenteritis/diarrhea (29.8%), and septicemia (11.7%) (Data file 1a).

105

106 Serum and nasopharyngeal (NP) swab samples were collected from 90 children each; for  
107 four children, only one of the two sample types was successfully collected. Although 45 (47.9%)  
108 of the children had a presenting symptom of diarrhea, stool samples were available for only 10  
109 due to logistical constraints. Blood smears identified *P. falciparum* in 12 of the 90 samples that  
110 underwent mNGS analysis.

111

### 112 **Metagenomic sequencing findings**

113 mNGS was performed on 90 serum, 90 NP swab, and 10 stool samples and analyses was  
114 done using the IDseq pipeline (see Methods section, Figure 1); detailed findings are reported in  
115 Data file S1b. For each sample type, RNA was extracted, libraries were prepared, samples were  
116 sequenced, and reads were analyzed using the IDseq Portal. A mean of 11.5 million (IQR 6.4 –  
117 15.2 million) paired-end reads were obtained per sample; sequencing statistics are in Data file  
118 Table S2. For one batch of serum samples, only a single read, rather than paired-end reads, was  
119 produced.

120

### 121 **mNGS of serum**

122 At least one microbial species was detected in 60 (66.7%) serum samples; more than one  
123 microbe was detected in 11 (12.2%) samples (Figure 2A). The most commonly identified  
124 microbes were *Plasmodium falciparum* (46, 51.1%) and parvovirus B19 (4, 4.4%). *P. falciparum*  
125 was detected in 10/12 samples from patients reported as smear-positive for malaria parasites.  
126 mNGS detected *Plasmodium spp.* in 37 additional samples that were smear negative (36 *P.*  
127 *falciparum*, 1 *P. malariae*). Viruses detected from serum included human immunodeficiency 1  
128 virus (HIV-1), hepatitis A virus, rotavirus A, human herpesvirus (HHV) type 6, HHV type 4,  
129 HHV type 7, human rhinovirus (HRV)-C, HRV-A, enteroviruses (enterovirus A71,  
130 Coxsackievirus B2 and echovirus E30), human parechovirus 2, hepatitis B virus, a novel  
131 orthobunyavirus (described in greater detail below), human cardiiovirus (Saffold virus),  
132 mamastrovirus 1 and Norwalk virus (Figure 2A).

133

134 Multiple viruses were detected from serum in patients with *Plasmodium* infections (10 of 46  
135 (21.7%) samples; Table S1a). Three of the four identified parvovirus B19 infections were

136 associated with *P. falciparum*. Additionally, GB virus C and torque teno virus (TTV), which are  
137 of unknown clinical significance [12], [13], were identified in the serum of 25 (27.8%) and 37  
138 (41.1%) children, respectively.

139

#### 140 **mNGS of NP swabs**

141 A total of 90 NP swabs was collected and processed; 52 (57.7%) of these were from  
142 patients with admission diagnoses of pneumonia, respiratory tract infection, or bronchiolitis  
143 (Table 1). Chest imaging was not available to further assess these diagnoses. 73 NP samples  
144 (81.1%) contained at least 1 viral species (Figure 2B). HRV-A and HRV-C were the most  
145 prevalent, followed by respiratory syncytial virus (RSV), cytomegalovirus (HHV-5), influenza  
146 B, and coronavirus OC43. Other respiratory viruses identified included influenza A, HRV-B,  
147 adenovirus B, 3 human parainfluenza virus types, metapneumovirus, coronavirus NL63, avian  
148 coronavirus, coxsackievirus A2, coxsackievirus B2, polyomaviruses (KI), HHV-6 and HHV- 7.  
149 Other viruses identified that are not typically considered respiratory pathogens included hepatitis  
150 A virus, hepatitis B virus, parvovirus B19, mamastrovirus 1, Bwamba orthobunyavirus,  
151 betapapillomavirus 1, and rotavirus. Additionally, TTV was found in 49 (54.4%) NP swab  
152 samples, including one sample with both gemykrogvirus and TTV. For 26 (28.8%) patients,  
153 mNGS identified respiratory viral co-infections, most commonly with HRV-C (n=11) and HRV-  
154 A (n=5) (Table S1b). The same microbial species was identified in the NP swab and serum  
155 samples in 6 patients, one each with HRV-A, HRV-C, hepatitis A virus, hepatitis B virus,  
156 rotavirus A, and parvovirus B19.

157

158 Bacteria identified in NP samples included four dominant genera, which together  
159 comprised 79% of all microbial reads—*Moraxella* (39.4%), *Haemophilus* (16.7%),  
160 *Streptococcus* (16.2%), and *Corynebacterium* (6.6%). Given that diversity loss in the microbial  
161 flora in lower respiratory tract samples correlates with pneumonia [14], [15], we compared the  
162 Simpsons diversity Index (SDI) in patients with and without clinical diagnoses of respiratory  
163 tract infection. We found no significant difference between patients with (mean SDI = 0.51, IQR  
164 0.37 - 0.65) or without (mean SDI = 0.51, IQR = 0.42 - 0.65;  $p = 0.86$ ) diagnoses of respiratory  
165 infection (Figure S1). This finding is consistent with a growing body of work demonstrating that  
166 microbial composition of the nasopharynx may not correlate well with that of the lower  
167 respiratory tract in patients with pneumonia [16]–[18].

168

#### 169 **mNGS of stool**

170 Among the 10 stool samples collected and sequenced, pathogens were detected in 9/10  
171 samples. The three most common pathogens identified were rotavirus A (50%), *Cryptosporidium*  
172 (40%), and human parechovirus (40%). Seven children had co-infections: two rotavirus A and  
173 human parechovirus, and one each rotavirus A and *Cryptosporidium*, rotavirus A and  
174 enterovirus, *Cryptosporidium* and human parechovirus, *Cryptosporidium* and Norwalk virus, and  
175 *Giardia* and human parechovirus. Five samples also had *Blastocystis hominis*, a microbe of  
176 uncertain pathogenicity.

177

#### 178 **Orthobunyaviruses**

179 Serum from one patient admitted with a clinical diagnosis of malaria and pneumonia  
180 contained a novel orthobunyavirus in addition to *P. falciparum*. Assembly of a draft genome and



181 comparison with existing orthobunyavirus genomes indicated that this draft sequence includes  
182 97.5%, 100% and 91% of the L, M, and S coding regions, respectively (Fig 3). Average read  
183 coverage across the segments was 86-fold. Phylogenetic comparison showed that the novel virus  
184 was significantly divergent from known orthobunyaviruses, sharing 44.9-55.1% amino acid  
185 identity with the closest known relatives, Calchaqui virus, Kaeng Khoi virus, and Anopheles A  
186 virus (Figure 3, Figures S3a-c). Of note, despite the divergence of this virus, 47.9% of the reads  
187 that belong to this new genome were detectable using default parameters in the IDseq pipeline,  
188 allowing for facile subsequent assembly. The virus was isolated from a patient from Nyangole  
189 village, Tororo District—hence, we propose the name “Nyangole virus”, consistent with  
190 nomenclature guidelines for the family *Bunyaviridae*.

191 In addition, a second orthobunyavirus, Bwamba virus, was identified in the NP swab  
192 sample from a patient admitted with rash, sepsis, and diarrhea. Insufficient sample and  
193 sequencing reads precluded genome assembly of this virus.

194

## 195 **Genomic characterization of human rhinoviruses and influenza B in NP swabs**

196

### 197 **Human rhinoviruses**

198 Within the species rhinovirus, we assembled *de novo* a total of 13 HRV-C (mean  
199 coverage: 39-fold) and 13 HRV-A (mean coverage: 268-fold) genomes (> 500 bp (Figure 4)). Of  
200 these, 10 HRV-A and 9 HRV-C genomes had complete coverage of the VP1 region, which is  
201 used to define enterovirus types [19]. HRV types are defined by divergence of >73% in the VP1  
202 gene. As such, we found three HRV-A and eight HRV-C types in this cohort. One individual  
203 harbored two distinct HRV-A types (genome pairwise identity=75.3%, VP1 pairwise

204 identity=67.1%). Additionally, we assembled two novel HRV-C isolates from two patients  
205 admitted with gastroenteritis (patient ID: EOFI-014), and pneumonia, malaria and diarrhea  
206 (patient ID: EOFI-133), that shared 70.1% and 70.7% nucleotide sequence identity at VP1  
207 compared to the closest known HRV-C (Accession JQ245968 and KF688606, respectively). The  
208 Picornavirus Working Group has established that novel HRV-Cs should exhibit at least 13%  
209 nucleotide sequence divergence in the VP1 gene [20], qualifying these two isolates as novel.

210

## 211 **Influenza B virus**

212 We assembled influenza B genome segments (>500bp, mean-coverage: 41-fold) from six  
213 of seven samples containing influenza B virus (one sample had insufficient sequencing reads).  
214 The viruses assembled were >99% similar to each other and >99% identical to the  
215 B/Massachusetts/02/2012-like virus included in the vaccine recommended by WHO for the  
216 2013-2014 northern hemisphere and 2014 southern hemisphere influenza seasons (Accession  
217 numbers: NC\_002204 to NC\_002211).

218

## 219 **Antimicrobial resistance profiling in the nasopharynx and stool**

220 We employed Short Read Sequencing Typing (SRST2) to survey the resistance gene  
221 landscape of our metagenomic dataset [21]. In total, 86% of patients were found to harbor  
222 molecular evidence of resistant organisms in their nasopharynx and 50% in their stool. For both  
223 stool and NP swabs, genes conferring resistance to beta lactams were the most abundant, and  
224 included *ampC* (n=2), which confers resistance to first through third generation cephalosporins,  
225 and *IMP-1* (n=1) which confers broad spectrum resistance that includes carbapenems. In

226 addition, genetic signatures of resistance to other antibacterial agents including aminoglycosides,  
227 macrolides/lincosamides, phenicols, sulfas, and tetracyclines were identified (Figure S2).

228

## 229 **Discussion**

230 The clinical management of children with fever is challenging in Africa, where clinicians  
231 often have access only to malaria diagnostics. A better understanding of the microbial agents  
232 causing fever in African children is needed to inform the development of better diagnostic  
233 algorithms and therapeutic guidelines. To address this unmet need, we developed and deployed  
234 IDseq in combination with unbiased mNGS to characterize the etiology of fever in Ugandan  
235 children admitted to a rural district hospital. We identified a wide range of pathogens in these  
236 children.

237

238 Other studies evaluating causes of febrile illness in African children have focused on a  
239 limited number of pathogens [22]–[25]. In a study of febrile children in Tanzania utilizing rapid  
240 diagnostic tests, serologic tests, culture, and molecular tests, viruses accounted for 51% of lower  
241 respiratory infections, 78% of systemic infections, and 100% of nasopharyngeal infections.  
242 Additionally, 9% of the children had malaria and 4.2% bacteremia [26]. In febrile children in  
243 Kenya, reported pathogens were spotted fever group *Rickettsia* (22.4%), influenza (22.4%),  
244 adenovirus (10.5%), parainfluenza virus 1-3 (10.1%), Q fever (8.9%), RSV (5.3%), malaria  
245 (5.2%), scrub typhus (3.6%), human metapneumovirus (3.2%), group A *Streptococcus* (2.3)%  
246 and typhus group *Rickettsiae* (1.0%) [27], [28]. Another study reported bacteremia in 19.1% of  
247 children admitted to a referral hospital in Uganda [29]. Additionally, in patients (across all age

248 groups) with severe febrile illness, bacteremia was detected in 10.1% in North Africa, 10.4% in  
249 East Africa, and 12.4% in West Africa [30].

250

251 Traditional pathogen detection methods, including culture, serology, and pathogen  
252 directed molecular methods, are logistically challenging in resource limited settings due to the  
253 need for extensive microbiology laboratory infrastructure. Unbiased sequencing approaches are  
254 designed to identify all potential pathogens, but have been limited by high cost. The costs of  
255 deep sequencing are rapidly decreasing, but the analysis of mNGS data necessarily incurs an  
256 increasingly large cost, as the available genomic databases to be searched continue to expand.  
257 Other major challenges for mNGS approaches include the need for better control datasets, in  
258 particular to enable discrimination of contaminants and commensal organisms from true  
259 pathogens. The IDseq platform was based on our prior experience with in-house pipelines for  
260 pathogen detection [5], [31], [32], and it aims to address existing computational and  
261 bioinformatics barriers by providing facile cloud-based mNGS analysis without the requirement  
262 for significant on-premise computational infrastructure.

263

264 Using mNGS and IDseq, the most common pathogen identified in the blood of febrile  
265 Ugandan children was *P. falciparum*, an expected result considering the high incidence of  
266 malaria in Tororo District at the time of this study [33]. Some discrepancies were seen compared  
267 to blood smear readings, with false positive smears probably due to errors in slide reading, a  
268 common problem in African clinics [34], and false negative smears due to the expected greater  
269 sensitivity of mNGS for identification of *P. falciparum*. In children with only sub-microscopic  
270 parasitemia, it is uncertain whether fevers can be ascribed to malaria, and in fact many children

271 had both *P. falciparum* and additional pathogens identified. Interestingly, three of the four cases  
272 of parvovirus B19 were found in association with *P. falciparum*; this co-infection has been  
273 associated with severe anemia with life-threatening consequences [35]–[37].

274

275 HRV was the most commonly identified virus in NP swab samples, consistent with  
276 findings previously reported in sub-Saharan Africa and developed countries [38]–[42]. HRV-C  
277 was most frequently encountered (54.1%), followed by HRV-A (43.2%) and HRV-B (2.7%),  
278 similar to the distribution of HRVs previously reported in Kenya [38]. We identified two novel  
279 HRV-C species; these viruses were about 70% identical to the most closely related previously  
280 described HRV-C species [20]. Overall, we detected at least three HRV-A and eight HRV-C  
281 types co-circulating in Tororo District. Of note, during the same collection period, a lethal HRV-  
282 C outbreak was reported in chimpanzees in Kibale National Park, in western Uganda [43]. The  
283 HRV-C reported in western Uganda was modestly related to an isolate observed in our study  
284 (74% nucleotide identity; 81% amino acid identity) (Figure 4) [43]. Our results confirm that a  
285 wide spectrum of HRVs infects Ugandan children. In addition to HRV, we detected a spectrum  
286 of other known respiratory viruses, including RSV, human parainfluenza viruses, human  
287 coronaviruses, and adenovirus.

288

289 Diarrheal disease is one of the leading causes of death in children in Africa [44].  
290 Approximately 48% of febrile children in our study presented with diarrhea, but due to logistical  
291 constraints stool specimens were available for only 10 cases. Rotavirus A, the leading cause of  
292 pediatric diarrhea worldwide [45], was the most commonly identified pathogen in this cohort.  
293 Rotavirus vaccination, known to be highly effective, is yet to be implemented in Uganda, but the

294 need is clear [45]. In addition to rotavirus A, we detected *Cryptosporidium*, norovirus, *Giardia*,  
295 *B. hominis* and several enteroviruses in stool specimens. Enteroviruses, HRV-C, and  
296 mamastrovirus were also identified in the serum of three children with clinical diagnoses of  
297 gastroenteritis or diarrhea.

298

299 Unbiased inspection of microbial sequences from sera revealed a novel member of the  
300 orthobunyavirus genus, tentatively named Nyangole virus, which was identified as a co-infection  
301 with *P. falciparum* in a child with clinical diagnoses of malaria and pneumonia. The virus was  
302 surprisingly divergent from known viruses, with an average amino acid similarity of 51.6% to its  
303 nearest known relatives including Calchaqui, Anopheles A and Kaeng Khoi viruses. Mosquitoes  
304 have been proposed as a vector for Calchaqui and Anopheles A viruses; Kaeng Khoi virus has  
305 been isolated from bedbugs [46]–[48]. Antibodies to these viruses have been detected in human  
306 sera, but their role as human pathogens is uncertain [46]–[49]. While the depth of coverage of  
307 Nyangole virus sequence in our patient suggests significant viremia, and other orthobunyaviruses  
308 are responsible for severe human illnesses (e.g., California encephalitis virus, La Crosse virus,  
309 Jamestown Canyon virus, and Cache Valley virus) [50], it is unknown whether the identified  
310 virus was responsible for the presenting symptoms.

311

312 NP swab analysis identified another Orthobunyavirus, Bwamba virus, in a child admitted  
313 with rash, sepsis and diarrhea. This virus has previously been described to cause fever in Uganda  
314 [51]. Our identification of two orthobunyaviruses, including one novel virus, in a small sample  
315 of febrile Ugandan children suggests that the landscape of previously unidentified viruses that  
316 infect African children and potentially cause febrile illness, is significantly under explored.

317           Molecular evidence of resistance to every available antibiotic except vancomycin in the  
318 WHO Essential Medicines List was identified in this study [52]. Three children had genotypic  
319 evidence of ESBL producing organisms predicted to be resistant to ceftriaxone, a frontline  
320 antibiotic for severe infections in this region [53]. In addition, one of these three children carried  
321 IMP-1, which also confers resistance to carbapenems, a class of antibiotics reserved for the most  
322 resistant infections.

323

324           Our exploratory pilot study had important limitations. First, our samples were not  
325 collected randomly, but rather were a convenience sample due to the logistical constraints of our  
326 small clinical study; as such the results should not be seen as broadly representative of pathogens  
327 infecting Ugandan children. In particular, the lack of identification of bacteremia in study  
328 subjects may have been due to a relative paucity of severe illness, compared to that in other  
329 studies, in our cohort of admitted children. Second, clinical evaluation of children followed the  
330 standards of a rural African hospital, so diagnostic evaluation was limited to physical  
331 examination and malaria blood smears. Much more may be learned by linking rigorous clinical  
332 evaluation with mNGS results, and thereby more comprehensively assessing associations  
333 between clinical syndromes and specific pathogens.

334

335           Despite these limitations, our study demonstrates the utility of the mNGS/IDseq platform,  
336 and provides an important cross sectional snapshot of causes of fever in African children.  
337 Combining unbiased mNGS and the IDseq platform enabled the identification of likely known  
338 and novel causes of pediatric illness, and makes available a powerful new open access tool for  
339 the characterization of infectious diseases in resource limited settings

## 340 **Potential implications**

341           This study provides a snapshot of pediatric fever in Tororo District, Uganda. mNGS  
342 permits universal pathogen detection using a single assay, and thus avoids the need for multiple  
343 independent, and often costly tests to determine disease etiology. Despite the promise and  
344 decreasing costs of this technology, the extensive computational and bioinformatic infrastructure  
345 needed to perform analysis of sequencing data remains a major barrier to implementation of  
346 mNGS in the developing world. Here we address the need for bioinformatic democratization and  
347 computational capacity building with IDseq, an open access platform to bring infectious disease  
348 surveillance to regions where it is needed most. As progress is made toward elimination of  
349 malaria in sub-Saharan Africa, it will be increasingly important to understand the landscape of  
350 pathogens that account for the remaining burden of morbidity and mortality. The use of mNGS  
351 can contribute importantly to this understanding, offering unbiased identification of infecting  
352 pathogens.

353

## 354 **Materials and Methods**

355

### 356 **Enrollment of study subjects:**

357           We studied children admitted to Tororo District Hospital, Tororo, Uganda, with febrile  
358 illnesses. Potential subjects were identified by clinic staff, who notified study personnel, who  
359 subsequently evaluated the children for study eligibility. Inclusion criteria were: 1) age 2-60  
360 months; 2) admission to Tororo District Hospital for acute illness; 3) documentation of axillary  
361 temperature  $>38.0^{\circ}\text{C}$  on admission or within 24 hours of admission; and 4) provision of  
362 informed consent from the parent or guardian for study procedures.



363

364 **Study specimens:**

365 NP swabs and blood were collected from each enrolled subject within 24 hours of  
366 hospital admission. Approximately 5 ml of blood was collected by phlebotomy, the sample was  
367 centrifuged at room temperature, and serum was then stored at -80°C. NP swab samples  
368 collected with FLOQSwabs™ swabs (COPAN) were placed into cryovials with Trizol  
369 (Invitrogen), and stored at -80°C within ~5 min of collection. For subjects with acute diarrhea ( $\geq$   
370 3 loose or watery stools in 24 hours), stool was collected into clean plastic containers and stored  
371 at -80°C within ~5 min of collection. Samples were stored at -80°C until shipment on dry ice to  
372 UCSF for sequencing.

373

374 **Clinical data:**

375 Clinical information was obtained from interviews with parents or guardians, with  
376 specific data entered onto a standardized case record form that included admission diagnosis and  
377 physical examination as well as malaria blood smear results. For malaria diagnosis, thick blood  
378 smears were Giemsa stained and evaluated by Tororo District Hospital laboratory personnel  
379 following routine standard-of-care practices. No efforts were made to improve on routine  
380 practice, so malaria smear readings represent routine standard-of-care rather than optimal quality  
381 controlled reads.

382

383 **Metagenomic next-generation sequencing (mNGS):**

384 After shipment to University of California, San Francisco, RNA was extracted from  
385 clinical samples as well as positive (HeLa cells) and negative (water) controls, and unbiased

386 cDNA libraries were generated using previously described method [54]. Barcoded samples were  
387 pooled, size selected (Blue Pippin), and run on an Illumina HiSeq2500 to obtain 135 base pair  
388 (bp) paired-end reads

389

### 390 **Bioinformatic analysis and pathogen identification:**

391 Microbial pathogens were identified from raw sequencing reads using the IDseq Portal  
392 (<https://idseq.net>), a novel cloud-based, open-source bioinformatics platform designed for  
393 detection of microbes from metagenomic data (Figure 1). IDseq scripts and user instructions are  
394 available at <https://github.com/chanzuckerberg/idseq-dag> and the graphical user interface web  
395 application for sample upload is available at <https://github.com/chanzuckerberg/idseq-web>.  
396 IDseq is conceptually based on previously implemented platforms [5], [31], [32], but is  
397 optimized for scalable Amazon Web Services (AWS) cloud deployment. Bioinformatics data  
398 processing jobs are carried out on demand as Docker containers using AWS Batch. Alignments  
399 to the National Center for Biotechnology Information (NCBI) database are executed on  
400 dedicated auto scaling groups (ASG) of Amazon Elastic Compute Cloud (EC2) instances, with  
401 the number of server instances varied with job load. Fast downloads of the NCBI database from  
402 the Amazon Simple Storage Service to each new server instance are enabled by the open-source  
403 tool s3mi (<https://github.com/chanzuckerberg/s3mi>). Initial alignment and removal of reads  
404 derived from the human genome is performed using the Spliced Transcripts Alignment to a  
405 Reference (STAR) algorithm [55]. Low-quality reads, duplicates, and low-complexity reads are  
406 then removed using the Paired-Read Iterative Contig Extension (PRICE) computational package  
407 [56], the CD-HIT-DUP tool [57], and a filter based on the Lempel-Ziv-Welch (LZW)  
408 compression score, respectively. A second round of human read filtering is carried out using

409 bowtie2 [58]. Remaining reads are queried against the most recent version of the NCBI  
410 nucleotide and non-redundant protein databases (updated monthly) using GSNAPL and  
411 RAPSearch2 [59], [60], respectively. Reads matching GenBank records in the superphylum  
412 Deuterostomia are removed, given the high likelihood that such residual reads are of human  
413 origin. The relative abundance of microbial taxa is calculated based on reads per million (rpM)  
414 mapped at the genus level. To distinguish potential pathogens from ubiquitous environmental  
415 agents including commensal flora, a Z-score is calculated for the value observed for each genus  
416 relative to a background of healthy and no-template control samples [31]. An overview of this  
417 pipeline is represented in Figure 1.

418

419 IDseq can process 150 samples at a given time. As of this writing, the current version of  
420 the IDseq pipeline (IDseqv1.8) processes fastq files with approximately 70 million reads,  
421 typically containing >99% host sequence, in 34 minutes. Run times may vary depending on  
422 demand, percentage of non-host sequence, and autoscaling parameters.

423

424 For this study we report species greater than 0 rpM and Z-scores detected in the serum,  
425 stool, and NP samples. Consistent with previous studies, low levels of “index bleed through” or  
426 “barcode hopping” (assignment of sequencing reads to the wrong barcode/index) was observed  
427 within the non-templated control samples [61]. To prevent mis-assignment, when a microbe  
428 found in more than one sample, it was reported only when present at levels at least four times the  
429 level of mis-assigned reads observed in the control samples. Given the extremely high levels of  
430 rotavirus found in stool samples, these samples were run in duplicate, and only microbes  
431 identified in both samples and present at levels at least four times the number of reads mis-

432 assigned in the control samples were reported. If the reads identified for a given pathogen were  
433 not species-specific, we reported the corresponding genus. For NP and stool samples, because  
434 the nasopharynx and intestines are normally colonized with commensal bacteria [62]–[65], only  
435 non-bacterial species were reported.

436

#### 437 **Genome assembly, annotation and phylogenetic analysis:**

438 To more comprehensively characterize the genomes of identified microbes PRICE [56]  
439 and St. Petersburg genome assembler (SPAdes) [66] were used to *de novo* assemble short read  
440 sequences into larger contiguous sequences (contigs). Assembled contigs were queried against  
441 the NCBI nt database using BLAST to identify the closest related microbes. GenBank annotation  
442 files from genome sequence records corresponding to the highest scoring alignments were used  
443 to identify potential features within the *de novo* assembled genomes. Geneious v10.3.2 was used  
444 to annotate newly assembled genomes. Reference genomes for multiple sequence alignments and  
445 phylogenetic analyses were downloaded from NCBI. Multiple sequence alignments were  
446 generated using ClustalW in MEGA v6.0 and the Geneious aligner in Geneious v10.3.2.  
447 Neighbor-joining phylogenetic trees were generated using Geneious v10.3.2 and further assessed  
448 using FigTree v1.4.3. Annotation of protein domains in the novel orthobunyaviruses was  
449 performed using the InterPro webserver [67] as well as direct alignment against previously  
450 known orthobunyaviruses. The TOPCONS webserver [68] was used for the identification of  
451 transmembrane regions and signal peptides, and the NetNglyc 1.0 Server  
452 (<http://www.cbs.dtu.dk/services/NetNGlyc/>) for the identification of glycosylation sites.

453

#### 454 **Evaluation of NP microbiome diversity:**

455 We applied SDI to evaluate alpha diversity of microbes identified in NP samples. For this  
456 analysis patients were stratified into two categories based on clinical assignment: respiratory  
457 infections (admitting diagnosis of pneumonia, respiratory tract infection, or bronchiolitis; n=52)  
458 and all other syndromes (n=39); cases with unknown admitting diagnosis were excluded. SDI  
459 was calculated in R using the Veganv2.4.4 package on genus-level reads per million values for  
460 all microbes, including bacteria. A Wilcox Rank Sum test was used to evaluate differences in  
461 SDI between patients in the two categories.

462

### 463 **Antimicrobial resistance gene identification in nasopharynx and stool:**

464 The SRST2 computational package was used to identify antimicrobial resistance genes  
465 using the Argannot2 database as previously described [21]. We defined extended spectrum  $\beta$ -  
466 lactamase (ESBL) as a  $\beta$ -lactamase conferring resistance to the penicillins, first-, second-, and  
467 third-generation cephalosporins including the gene classes proposed by Giske et al [69].

468

### 469 **Availability of data and code**

470 All raw data have been deposited under Bioproject ID: PRJNA483304. Assembled  
471 genomes can be accessed in GenBank: Accession numbers: MH685676-MH685701,  
472 MH685703- MH685719, MH684286-MH684293, MH684298-MH684334. All the raw data,  
473 intermediate data and IDseq reports can also be accessed at <https://idseq.net> [Project ID: Uganda  
474 - all - 2]. All IDseq scripts and user instructions are available at  
475 <https://github.com/chanzuckerberg/idseq-dag> and the graphical user interface web application for  
476 sample upload is available at <https://github.com/chanzuckerberg/idseq-web>. While IDseq is

477 under continuous development and improvement, full version control of processing runs and  
478 reference databases are standard features.

479

480 **Declarations:**

481 **List of abbreviations**

482 AWS Amazon Web Services  
483 ASG Auto Scaling Groups  
484 BLAST Basic Local Alignment Search Tool  
485 EC2 Elastic Compute Cloud  
486 ESBL Extended spectrum  $\beta$ -lactamase  
487 HHV human herpesvirus  
488 HIV-1 human immunodeficiency 1 virus  
489 HRV Human Rhinovirus  
490 IQR Inter-quartile range  
491 L coding region Large segment coding region (RNA-dependent RNA polymerase)  
492 LZW Lempel-Ziv-Welch  
493 M coding region Medium segment coding region (glycoprotein)  
494 MEGA Molecular Evolutionary Genetics Analysis  
495 mNGS metagenomic next-generation sequencing  
496 NCBI National Center for Biotechnology Information  
497 NP swab Nasopharyngeal swab  
498 nr database non-redundant database  
499 nt database nucleotide database  
500 PRICE Paired-Read Iterative Contig Extension  
501 rpM reads per million  
502 RSV respiratory syncytial virus  
503 S coding region Small segment coding region (nucleocapsid)  
504 SDI Simpsons diversity Index  
505 SPAdes St Petersburg genome assembler  
506 SRST2 Short Read Sequencing Typing  
507 STAR Spliced Transcripts Alignment to a Reference  
508 TTV torque teno virus  
509 VP1 Capsid protein VP1  
510 WHO World Health Organization

511

512 **Ethics approval and consent to participate**

513 The study protocol was approved by the Uganda National Council of Science and Technology  
514 and the Institutional Review Boards of the School of Medicine, Makerere University-College of  
515 Health Sciences and the University of California, San Francisco.

516

#### 517 **Competing interests**

518 None

519

#### 520 **Funding**

521 JLD is supported by the Chan Zuckerberg Biohub. CB, BD, YJ, JS, RE and JW are funded by  
522 the Chan Zuckerberg Initiative. SN was supported by Howard Hughes Medical Institute. PJR is  
523 funded by the National Institutes of Health, and work on this project by JH, MK, OB, and PJR  
524 was funded by the Doris Duke Charitable Foundation. MRW is supported by the Rachleff  
525 Foundation, NINDS K08NS096117 and the University of California, San Francisco Center for  
526 Next-Gen Precision Diagnostics, which is supported by the Sandler Foundation and the William  
527 K. Bowes, Jr. Foundation. AR is supported by the Rachleff Foundation. CL is supported by  
528 NHLBI K23HL138461-01A1 , Nina Ireland Foundation and Marcus Program in Precision  
529 Medicine. KK is supported by the UC Berkeley UC San Francisco Joint Program in  
530 Bioengineering.

531

#### 532 **Authors contributions**

533 SN, JH, MK, OB, TR, AM, PR and JLD contributed to experimental design, data acquisition and  
534 sample processing. SN, JH, MK, OB, PR, TR, and AM, contributed to patient recruitment and  
535 clinical testing. CB, BD, YJ, JS, RE, and JW developed the IDseq pipeline. AR, KK, CL, SN,

536 PR, MRW, and JLD contributed to data analysis. AR, MRW, PR, and JLD contributed to  
537 manuscript writing.

538

### 539 **Acknowledgements**

540 We thank the children and families in Tororo District, Uganda, who participated in this study.

541 We thank Eric Chow, Jessica Lund, and the UCSF Center for Advanced Technology for

542 assistance with sequencing. We recognize Amy Kistler. for intellectual discussions and

543 comments on the paper. We thank Mark Stenglein for his helpful discussions and advice.

544

### 545 **Figures:**

546 Figure 1: Schematic representation of IDseq pipeline

547 Figure 2: Microbes found in (A) serum and (B) nasopharyngeal (NP) swab samples. Note that  
548 bacterial species were not considered for NP samples.

549 Figure 3: Characterization of the novel orthobunyavirus identified in a febrile child. (A)

550 Schematic representation of the large (L) or RNA dependent RNA polymerase, medium (M) or

551 polyprotein of Gn, NSm and Gc proteins and small (S) segment encoding the nucleocapsid (N)

552 protein of Nyangole virus and percentage identity with the most closely related virus.

553 Phylogenetic tree of all complete orthobunyavirus genome sequences along with Nyangole virus

554 are represented in (B) for the RNA dependent RNA polymerase and (C) for the glycoprotein.

555 Figure 4: Phylogenetic tree of all complete HRV genomes from NCBI and HRV genomes

556 assembled in this study (Purple – Rhinovirus A, Orange – Rhinovirus C)

557

### 558 **Supplemental figures:**



559 Figure S1: Simpsons diversity index (SDI) for samples with pneumonia versus other etiologies.

560 Each triangle represents one sample.

561 Figure S2: Antimicrobial resistant genes identified in (A) nasopharynx and (B) stool samples

562 Figure S3: Complete phylogenetic tree of (A) Large (L) or RNA dependent RNA polymerase,

563 (B) Medium (M) or polyprotein of Gn, NSm and Gc proteins and (C) Small (S) segment

564 encoding Nucleocapsid segments

565

566 **Table 1:** Overview of the patients enrolled in the study

| Clinical category             | Age<br>(mean,<br>months) | Gender |        |
|-------------------------------|--------------------------|--------|--------|
|                               |                          | Male   | Female |
| Respiratory illness (54)      | 14.0                     | 25     | 28     |
| Diarrhea/gastroenteritis (28) | 12.1                     | 9      | 19     |
| Malaria (11)                  | 15.5                     | 3      | 7      |
| Sepsis (11)                   | 19.9                     | 5      | 6      |
| Malnutrition (5)              | 18.4                     | 2      | 3      |
| Other (15)                    | 21.1                     | 11     | 3      |

The other category includes the following admission criteria: unknown (n=10), UTI (n=1), meningitis (n=2), hepatitis (n=1), fever (n=1). Gender information were missing for one child in the following categories: Respiratory illness, Malaria and Other. Age information were missing for one child in the following categories: Respiratory illness and Other.

567

568 **Table S1:** (A) Co-infection table for *P. falciparum*

| Microbial co-infections with <i>P.falciparum</i> | Number of cases |
|--------------------------------------------------|-----------------|
| Parvovirus B19                                   | 2               |
| Human herpesvirus 4                              | 1               |
| Human immunodeficiency virus 1                   | 1               |
| Norwalk virus                                    | 1               |
| Orthobunyavirus                                  | 1               |
| HRV-A                                            | 1               |
| HRV-C                                            | 1               |
| Rotavirus A                                      | 1               |
| Parvovirus B19, HRV-C and human parechovirus 2   | 1               |

569

570 **Table S1:** B) Co-infection table for HRV

| microbial co-infections with HRV                    | number of cases |
|-----------------------------------------------------|-----------------|
| Human coronavirus OC43                              | 2               |
| Human parainfluenza virus 1                         | 2               |
| Rotavirus A                                         | 2               |
| Hepatitis A                                         | 1               |
| HHV type 5                                          | 1               |
| HHV type 6                                          | 1               |
| Human parainfluenza virus 4                         | 1               |
| RSV                                                 | 1               |
| KI polyomavirus                                     | 1               |
| RSV and Mamastrovirus 1                             | 1               |
| RSV and human parainfluenza virus 1                 | 1               |
| HHV type 5 HHV type 7, human coronavirus OC43       | 1               |
| Hepatitis B, human coronavirus NL63 and influenza A | 1               |

571

572 **Data files:**

573 Data file 1: (A) Clinical signs and symptoms of patients enrolled in the study. (B) mNGS

574 findings in patients enrolled in the study

575 Data file 2: Total number of sequencing reads and unique non-human reads in all samples

576 analyzed

577

578 **References**

579

- 580 1. Maze MJ, Bassat Q, Feasey NA, Mandomando I, Musicha P, Crump JA. The  
581 epidemiology of febrile illness in sub-Saharan Africa: implications for diagnosis and  
582 management. *Clin Microbiol Infect.* 2018; 24(8):808-814. doi:10.1016/j.cmi.2018.02.011.
- 583 2. Prasad N, Sharples KJ, Murdoch DR, Crump JA. Community prevalence of fever and  
584 relationship with malaria among infants and children in low-resource areas. *Am J Trop  
585 Med Hyg.* 2015;93(1):178-180. doi:10.4269/ajtmh.14-0646.

- 586 3. Guidelines for the treatment of malaria, 2nd edition. World Health Organization. 2010.
- 587 4. Bibby K. Metagenomic identification of viral pathogens. *Trends Biotechnol.*  
588 2013;31(5):275-279. doi:10.1016/j.tibtech.2013.01.016.
- 589 5. Yozwiak NL, Skewes-Cox P, Stenglein MD, Balmaseda A, Harris E, DeRisi JL. Virus  
590 identification in unknown tropical febrile illness cases using deep sequencing. *PLoS Negl*  
591 *Trop Dis.* 2012;6(2):e1485. doi:10.1371/journal.pntd.0001485.
- 592 6. Wilson MR, Naccache SN, Samayoa E, et al. Actionable Diagnosis of Neuroleptospirosis  
593 by Next-Generation Sequencing. *N Engl J Med.* 2014;370(25):2408-2417.  
594 doi:10.1056/NEJMoa1401268.
- 595 7. Wilson MR, Shanbhag NM, Reid MJ, et al. Diagnosing Balamuthia mandrillaris  
596 Encephalitis with Metagenomic Deep Sequencing. *Ann Neurol.* 2015;78(5):722-730.  
597 doi:10.1002/ana.24499.
- 598 8. Doan T, Wilson MR, Crawford ED, et al. Illuminating uveitis: metagenomic deep  
599 sequencing identifies common and rare pathogens. *Genome Med.* 2016;8:1-2.  
600 doi:10.1186/s13073-016-0344-6.
- 601 9. Quan PL, Wagner TA, Briese T, et al. Astrovirus encephalitis in boy with X-linked  
602 agammaglobulinemia. *Emerg Infect Dis.* 2010;16(6):918-925.  
603 doi:10.3201/eid1606.091536.
- 604 10. Palacios G, Druce J, Du L, et al. A New Arenavirus in a Cluster of Fatal Transplant-  
605 Associated Diseases. *N Engl J Med.* 2008;358:991-998. doi: 10.1056/NEJMoa073785.
- 606 11. Muir P, Li S, Lou S, et al. The real cost of sequencing: Scaling computation to keep pace  
607 with data generation. *Genome Biol.* 2016;17(1):1-9. doi:10.1186/s13059-016-0917-0.
- 608 12. Naoumov N V. TT virus - highly prevalent, but still in search of a disease. *J Hepatol.*

- 609 2000;33(13):157-159. doi:10.1016/S0168-8278(00)80173-7.
- 610 13. Hafez MM, Shaarawy SM, Hassan AA, Salim RF, Abd El Salam FM, Ali AE. Prevalence  
611 of transfusion transmitted virus (TTV) genotypes among HCC patients in Qaluobia  
612 governorate. *Virology*. 2007;4:1-6. doi:10.1186/1743-422X-4-135.
- 613 14. Abreu NA, Nagalingam NA, Song Y, et al. Sinus Microbiome Diversity Depletion and  
614 *Corynebacterium tuberculo-stearicum* Enrichment Mediates Rhinosinusitis. *Sci Transl*  
615 *Med*. 2012;4(151):151ra124-151ra124. doi:10.1126/scitranslmed.3003783.
- 616 15. Langelier C, Zinter M, Kalantar K, et al. Metagenomic Next-Generation Sequencing  
617 Detects Pulmonary Pathogens in Hematopoietic Cellular Transplant Patients with Acute  
618 Respiratory Illnesses. *Am J Respir Crit Care Med*. 2018 Feb 15;197(4):524-528. doi:  
619 10.1164/rccm.201706-1097LE.
- 620 16. Park DE, Baggett HC, Howie SRC, et al. Colonization density of the upper respiratory  
621 tract as a predictor of pneumonia - *Haemophilus influenzae*, *Moraxella catarrhalis*,  
622 *Staphylococcus aureus*, and *Pneumocystis jirovecii*. *Clin Infect Dis*. 2017;64:S328-S336.  
623 doi:10.1093/cid/cix104.
- 624 17. Loens K, Van Heirstraeten L, Malhotra-Kumar S, Goossens H, Ieven M. Optimal  
625 sampling sites and methods for detection of pathogen possibly causing community-  
626 acquired lower respiratory tract infections. *J Clin Microbiol*. 2009;47(1):21-31.  
627 doi:10.1128/JCM.02037-08.
- 628 18. Zar HJ, Barnett W, Stadler A, Gardner-Lubbe S, Myer L, Nicol MP. Aetiology of  
629 childhood pneumonia in a well vaccinated South African birth cohort: A nested case-  
630 control study of the Drakenstein Child Health Study. *Lancet Respir Med*. 2016;4(6):463-  
631 472. doi:10.1016/S2213-2600(16)00096-5.

- 632 19. Lukashev AN, Vakulenko YA. Molecular evolution of types in non-polio enteroviruses. *J*  
633 *Gen Virol.* 2017;98(12):2968-2981. doi:10.1099/jgv.0.000966.
- 634 20. McIntyre CL, Knowles NJ, Simmonds P. Proposals for the classification of human  
635 rhinovirus species A, B and C into genotypically assigned types. *J Gen Virol.*  
636 2013;94(PART8):1791-1806. doi:10.1099/vir.0.053686-0.
- 637 21. Inouye M, Dashnow H, Raven LA, et al. SRST2: Rapid genomic surveillance for public  
638 health and hospital microbiology labs. *Genome Med.* 2014;6(11):1-16.  
639 doi:10.1186/s13073-014-0090-6.
- 640 22. Chipwaza B, Mugasa JP, Selemani M, et al. Dengue and Chikungunya Fever among Viral  
641 Diseases in Outpatient Febrile Children in Kilosa District Hospital, Tanzania. *PLoS Negl*  
642 *Trop Dis.* 2014;8(11). doi:10.1371/journal.pntd.0003335.
- 643 23. Jacob ST, Pavlinac PB, Nakiyingi L, et al. Mycobacterium tuberculosis Bacteremia in a  
644 Cohort of HIV-Infected Patients Hospitalized with Severe Sepsis in Uganda-High  
645 Frequency, Low Clinical Sand Derivation of a Clinical Prediction Score. *PLoS One.*  
646 2013;8(8). doi:10.1371/journal.pone.0070305.
- 647 24. Crump JA, Morrissey AB, Nicholson WL, et al. Etiology of Severe Non-malaria Febrile  
648 Illness in Northern Tanzania: A Prospective Cohort Study. *PLoS Negl Trop Dis.*  
649 2013;7(7). doi:10.1371/journal.pntd.0002324.
- 650 25. Chipwaza B, Mhamphi GG, Ngatunga SD, et al. Prevalence of Bacterial Febrile Illnesses  
651 in Children in Kilosa District, Tanzania. *PLoS Negl Trop Dis.* 2015;9(5).  
652 doi:10.1371/journal.pntd.0003750.
- 653 26. D'Acromont V, Kilowoko M, Kyungu E, et al. Beyond Malaria — Causes of Fever in  
654 Outpatient Tanzanian Children. *N Engl J Med.* 2014;370(9):809-817.

- 655           doi:10.1056/NEJMoa1214482.
- 656   27.   O'Meara WP, Mott JA, Laktabai J, et al. Etiology of pediatric fever in Western Kenya: A  
657           case-control study of falciparum Malaria, Respiratory Viruses, and Streptococcal  
658           Pharyngitis. *Am J Trop Med Hyg.* 2015;92(5):1030-1037. doi:10.4269/ajtmh.14-0560.
- 659   28.   Maina AN, Farris CM, Odhiambo A, et al. Q fever, scrub typhus, and rickettsial diseases  
660           in children, Kenya, 2011–2012. *Emerg Infect Dis.* 2016;22(5):883-886.  
661           doi:10.3201/eid2205.150953.
- 662   29.   Kibuuka A, Byakika-Kibwika P, Achan J, et al. Bacteremia among febrile ugandan  
663           children treated with antimalarials despite a negative malaria test. *Am J Trop Med Hyg.*  
664           2015;93(2):276-280. doi:10.4269/ajtmh.14-0494.
- 665   30.   Prasad N, Murdoch DR, Reyburn H, Crump JA. Etiology of severe febrile illness in low-  
666           and middle-income countries: A systematic review. *PLoS One.* 2015;10(6):1-25.  
667           doi:10.1371/journal.pone.0127962.
- 668   31.   Wilson MR, O'Donovan BD, Gelfand JM, et al. Chronic Meningitis Investigated via  
669           Metagenomic Next-Generation Sequencing. *JAMA Neurol.* 2018;94:158.  
670           doi:10.1001/jamaneurol.2018.0463.
- 671   32.   Naccache SN, Federman S, Veeraraghavan N, et al. A cloud-compatible bioinformatics  
672           pipeline for ultrarapid pathogen identification from next-generation sequencing of clinical  
673           samples. *Genome Res.* 2014;24(7):1180-1192. doi:10.1101/gr.171934.113.
- 674   33.   Oguttu DW, Matovu JKB, Okumu DC, et al. Rapid reduction of malaria following  
675           introduction of vector control interventions in Tororo District, Uganda: a descriptive  
676           study. *Malar J.* 2017;16(1):1-8. doi:10.1186/s12936-017-1871-3.
- 677   34.   Mekonnen SK, Aseffa A, Medhin G, Berhe N, Velavan TP. Re-evaluation of microscopy

- 678 confirmed *Plasmodium falciparum* and *Plasmodium vivax* malaria by nested PCR  
679 detection in southern Ethiopia. *Malar J.* 2014;13(48). doi:10.1186/1475-2875-13-48.
- 680 35. Agarwal R, Baid R, Datta R, Saha M, Sarkar N. *Falciparum* malaria and parvovirus B19  
681 coinfection: A rare entity. *Trop Parasitol.* 2017;7(1):47-48. doi:10.4103/2229-  
682 5070.202299
- 683 36. Duedu KO, Sagoe KWC, Ayeh-Kumi PF, Affrim RB, Adiku T. The effects of co-  
684 infection with human parvovirus B19 and *Plasmodium falciparum* on type and degree of  
685 anaemia in Ghanaian children. *Asian Pac J Trop Biomed.* 2013;3(2):129-139.  
686 doi:10.1016/S2221-1691(13)60037-4.
- 687 37. Toan NL, Sy BT, Song LH, et al. Co-infection of human parvovirus B19 with  
688 *Plasmodium falciparum* contributes to malaria disease severity in Gabonese patients.  
689 *BMC Infect Dis.* 2013;13(1). doi:10.1186/1471-2334-13-375.
- 690 38. Onyango CO, Welch SR, Munywoki PK, et al. Molecular epidemiology of human  
691 rhinovirus infections in Kilifi, coastal Kenya. *J Med Virol.* 2012;84(5):823-831.  
692 doi:10.1002/jmv.23251.
- 693 39. O'Callaghan-Gordo C, Bassat Q, Morais L, et al. Etiology and epidemiology of viral  
694 pneumonia among hospitalized children in rural mozambique: A malaria endemic area  
695 with high prevalence of human immunodeficiency virus. *Pediatr Infect Dis J.*  
696 2011;30(1):39-44. doi:10.1097/INF.0b013e3181f232fe.
- 697 40. Mbayame Ndiaye Niang, Ousmane M. Diop, Fatoumata Diene Sarr, Deborah Goudiaby,  
698 Hubert Malou-Sompy, Kader Ndiaye, Astrid Vabret LB. Viral Etiology of Respiratory  
699 Infections in Children Under 5 Years Old Living in Tropical Rural Areas of Senegal: The  
700 EVIRA Project. *J Med Virol.* 2010;82:866-872. doi: 10.1002/jmv.21665.

- 701 41. Smuts HE, Workman LJ, Zar HJ. Human rhinovirus infection in young African children  
702 with acute wheezing. *BMC Infect Dis.* 2011;11(1):65. doi:10.1186/1471-2334-11-65.
- 703 42. Jain S, Self WH, Wunderink RG, et al. Community-Acquired Pneumonia Requiring  
704 Hospitalization among U.S. Adults. *N Engl J Med.* 2015;373(5):415-427.  
705 doi:10.1056/NEJMoa1500245.
- 706 43. Scully EJ, Basnet S, Wrangham RW, et al. Lethal Respiratory Disease Associated with  
707 Human Rhinovirus C in Wild Chimpanzees, Uganda, 2013. *Emerg Infect Dis.* 2018;24(2).  
708 doi:10.3201/eid2402.170778.
- 709 44. Diarrhoeal Disease. World Health Organization. 2017. [http://www.who.int/news-](http://www.who.int/news-room/fact-sheets/detail/diarrhoeal-disease)  
710 [room/fact-sheets/detail/diarrhoeal-disease](http://www.who.int/news-room/fact-sheets/detail/diarrhoeal-disease). Accessed 20 June 2018.
- 711 45. Mwenda JM, Burke RM, Shaba K, et al. Implementation of Rotavirus Surveillance and  
712 Vaccine Introduction - World Health Organization African Region, 2007-2016. *MMWR*  
713 *Morb Mortal Wkly Rep.* 2017;66(43):1192-1196. doi:10.15585/mmwr.mm6643a7.
- 714 46. Calisher CH, Monath TP, Sabbatini MS, et al. A newly recognized vesiculovirus,  
715 Calchaqui virus, and subtypes of Melao and Maguari viruses from Argentina, with  
716 serologic evidence for infections of humans and horses. *Am J Trop Med Hyg.*  
717 1987;36(1):114-119.
- 718 47. Mohamed M, McLees A, Elliott RM. Viruses in the Anopheles A, Anopheles B, and Tete  
719 Serogroups in the Orthobunyavirus Genus (Family Bunyaviridae) Do Not Encode an NSs  
720 Protein. *J Virol.* 2009;83(15):7612-7618. doi:10.1128/JVI.02080-08.
- 721 48. Williams JE, Imlarp S, Top FH, Cavanaugh DC, Russell PK. Kaeng Khoi virus from  
722 naturally infected bedbugs (Cimicidae) and immature free tailed bats. *Bull World Health*  
723 *Organ.* 1976;53(4):365-369.



- 724 49. Patroca da Silva S, Chiang JO, Marciel de Souza W, et al. Characterization of the Gamboa  
725 Virus Serogroup (Orthobunyavirus Genus, Peribunyaviridae Family). *Am J Trop Med*  
726 *Hyg.* 2018;98(5):tpmd170810. doi:10.4269/ajtmh.17-0810.
- 727 50. Plyusnin A, Elliott RM. *Bunyaviridae: Molecular and Cellular Biology.*; 2011.
- 728 51. Lutwama JJ, Rwaguma EB, Nawanga PL, Mukuye A. Isolations of Bwamba virus from  
729 south central Uganda and north eastern Tanzania. *Afr Health Sci.* 2002;2(1):24-28.
- 730 52. WHO Model List of Essential Medicines. Edition 14, 2017
- 731 53. UGANDA CLINICAL GUIDELINES. Ministry of Health. 2012.
- 732 54. Stenglein MD, Sanchez-Migallon Guzman D, Garcia VE, et al. Differential Disease  
733 Susceptibilities in Experimentally Reptarenavirus-Infected Boa Constrictors and Ball  
734 Pythons. *J Virol.* 2017;91(15):e00451-17. doi:10.1128/JVI.00451-17.
- 735 55. Dobin A, Davis CA, Schlesinger F, et al. STAR: Ultrafast universal RNA-seq aligner.  
736 *Bioinformatics.* 2013;29(1):15-21. doi:10.1093/bioinformatics/bts635.
- 737 56. Ruby JG, Bellare P, Derisi JL. PRICE: software for the targeted assembly of components  
738 of (Meta) genomic sequence data. *G3 (Bethesda).* 2013;3(5):865-880.  
739 doi:10.1534/g3.113.005967.
- 740 57. Li W, Godzik A. Cd-hit: A fast program for clustering and comparing large sets of protein  
741 or nucleotide sequences. *Bioinformatics.* 2006;22(13):1658-1659.  
742 doi:10.1093/bioinformatics/btl158.
- 743 58. Langmead B, Salzberg SL. Fast gapped-read alignment with Bowtie 2. *Nat Methods.*  
744 2012;9(4):357-359. doi:10.1038/nmeth.1923.
- 745 59. Wu TD, Nacu S. Fast and SNP-tolerant detection of complex variants and splicing in short  
746 reads. *Bioinformatics.* 2010;26(7):873-881. doi:10.1093/bioinformatics/btq057.

- 747 60. Ye Y, Choi J-H, Tang H. RAPSearch: a fast protein similarity search tool for short reads.  
748 BMC Bioinformatics. 2011;12(1):159. doi:10.1186/1471-2105-12-159.
- 749 61. Wilson MR, Fedewa G, Stenglein MD, et al. Multiplexed Metagenomic Deep Sequencing  
750 To Analyze the Composition of High-Priority Pathogen Reagents. mSystems.  
751 2016;1(4):e00058-16. doi:10.1128/mSystems.00058-16.
- 752 62. Bogaert D, Keijser B, Huse S, et al. Variability and diversity of nasopharyngeal  
753 microbiota in children: A metagenomic analysis. PLoS One. 2011;6(2).  
754 doi:10.1371/journal.pone.0017035.
- 755 63. Pérez-Losada M, Alamri L, Crandall KA, Freishtat RJ. Nasopharyngeal microbiome  
756 diversity changes over time in children with asthma. PLoS One. 2017;12(1):1-13.  
757 doi:10.1371/journal.pone.0170543.
- 758 64. Hooper L V, Gordon JI. Commensal Host-Bacterial Relationships in the Gut. Science (80-  
759 ). 2001;1115(10):1-7. doi:10.1126/science.1058709.
- 760 65. Sekirov I, Russell S, Antunes L. Gut microbiota in health and disease. Physiol Rev.  
761 2010;90(3):859-904. doi:10.1152/physrev.00045.2009.
- 762 66. Bankevich A, Nurk S, Antipov D, et al. SPAdes: A New Genome Assembly Algorithm  
763 and Its Applications to Single-Cell Sequencing. J Comput Biol. 2012;19(5):455-477.  
764 doi:10.1089/cmb.2012.0021.
- 765 67. Mitchell A, Chang HY, Daugherty L, et al. The InterPro protein families database: The  
766 classification resource after 15 years. Nucleic Acids Res. 2015;43(D1):D213-D221.  
767 doi:10.1093/nar/gku1243.
- 768 68. Tsirigos KD, Peters C, Shu N, Käll L, Elofsson A. The TOPCONS web server for  
769 consensus prediction of membrane protein topology and signal peptides. Nucleic Acids

770 Res. 2015;43(W1):W401-W407. doi:10.1093/nar/gkv485.

771 69. Giske CG, Cornaglia G. Supranational surveillance of antimicrobial resistance: The legacy  
772 of the last decade and proposals for the future. Drug Resist Updat. 2010;13(4-5):93-98.  
773 doi:10.1016/j.drug.2010.08.002.

774

Figure 1

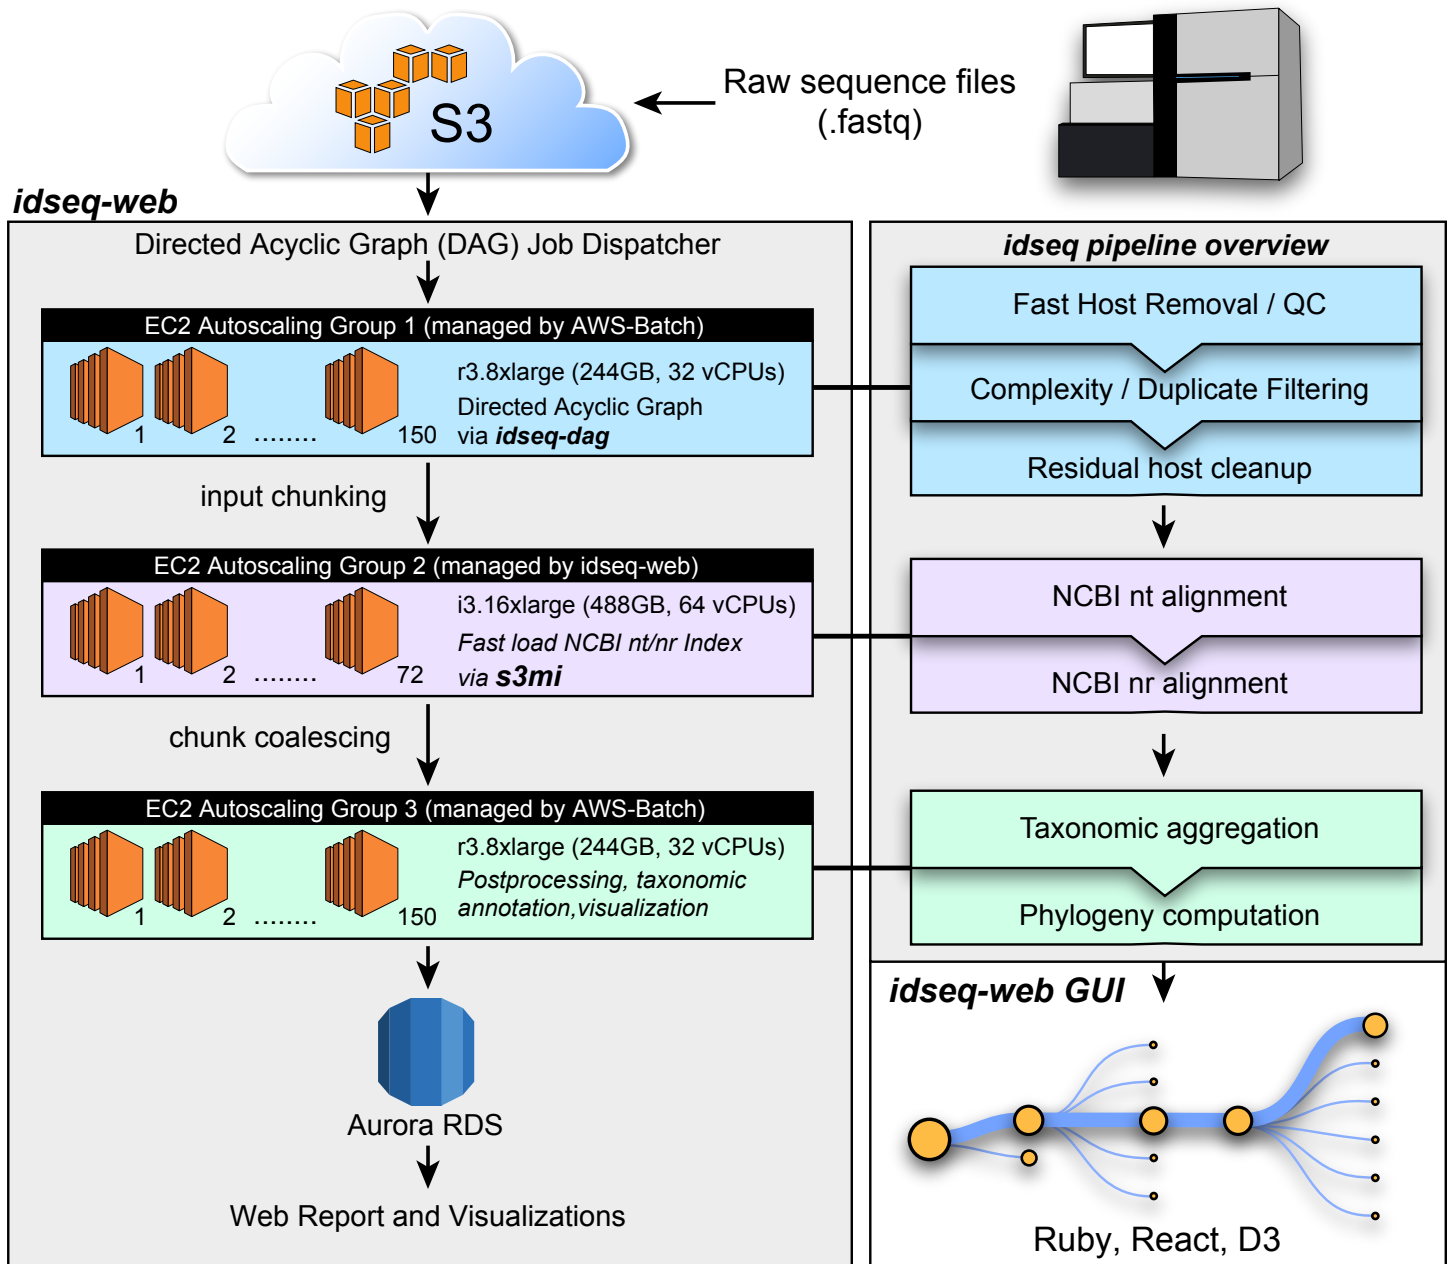

Figure 2

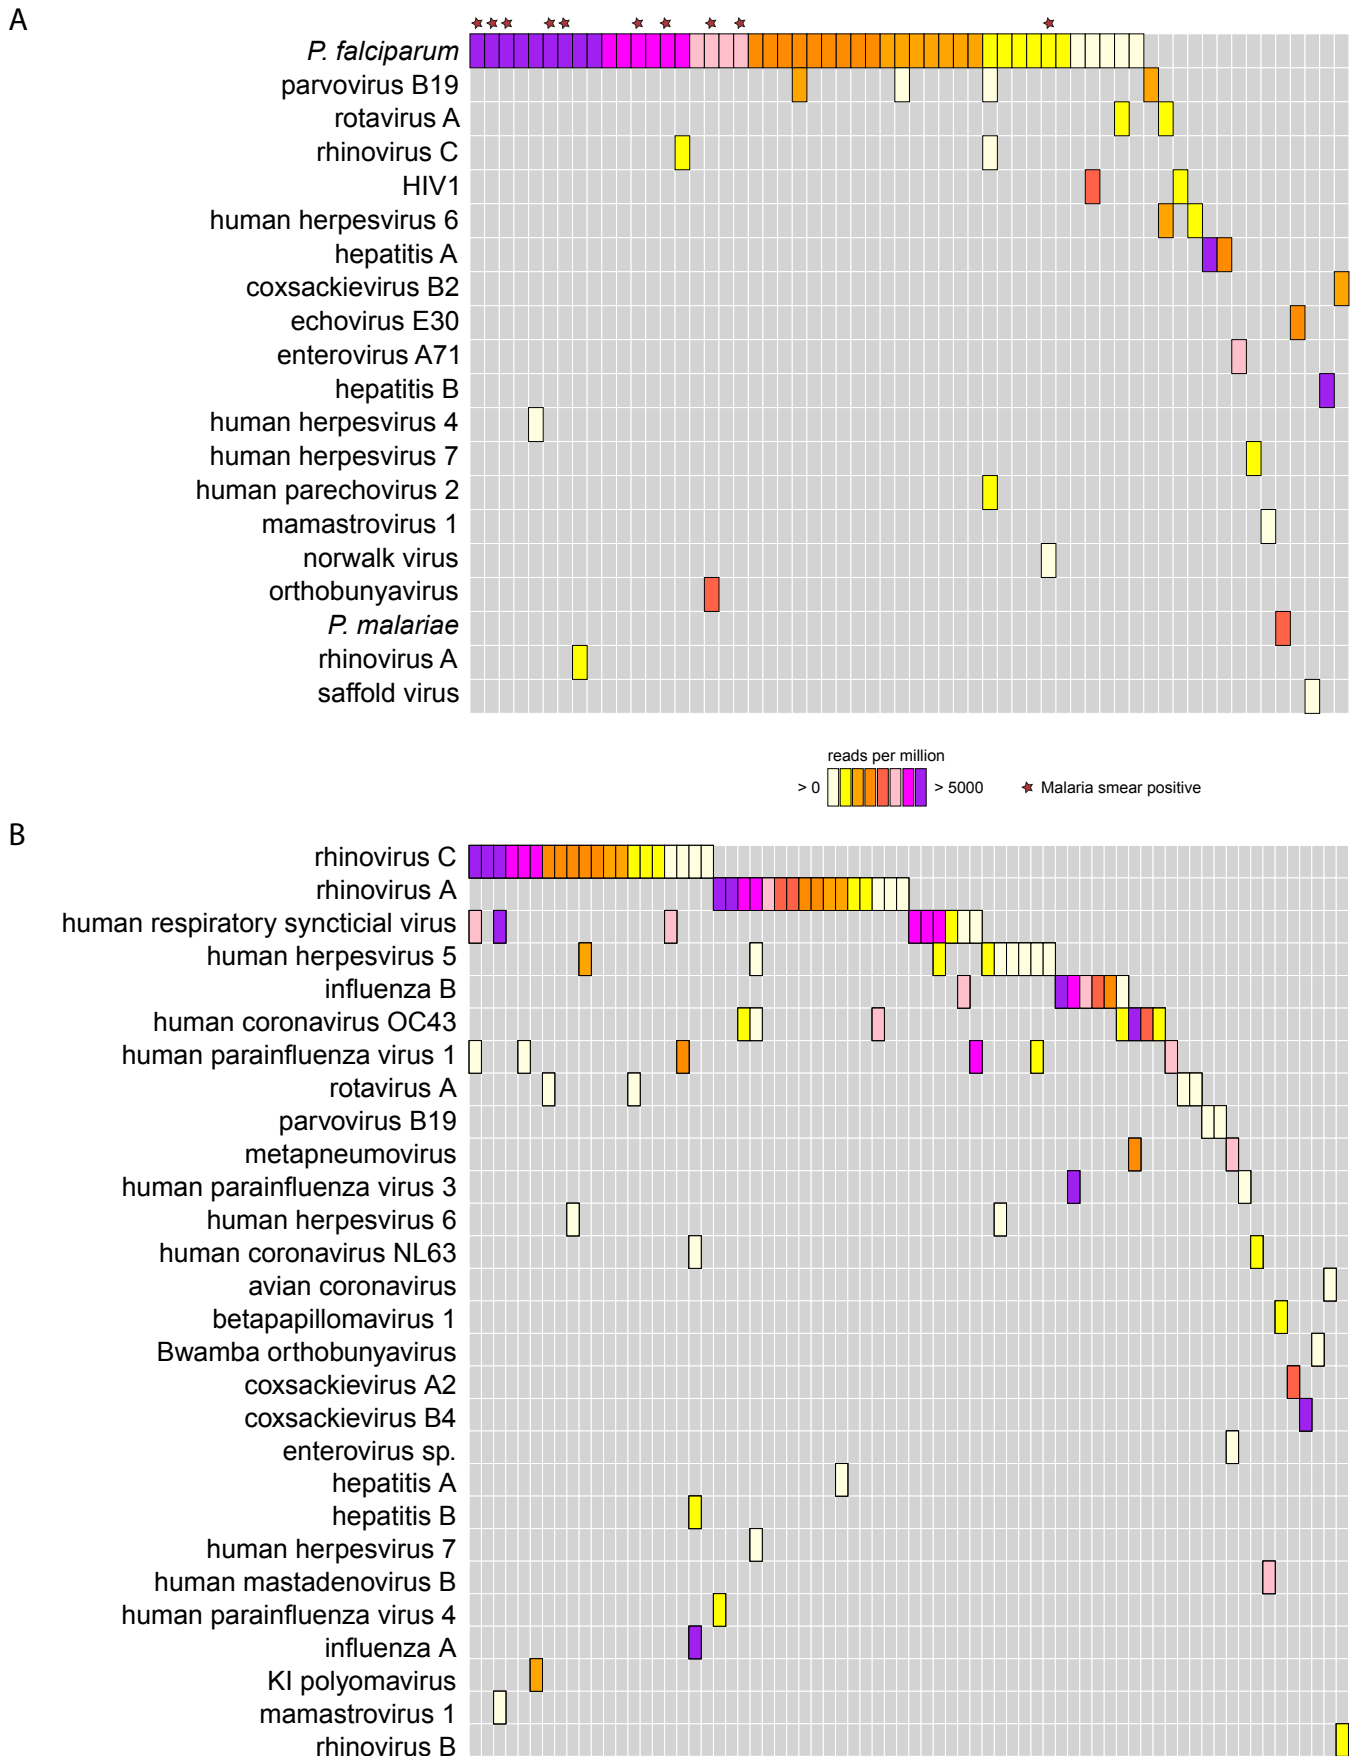

Figure 3

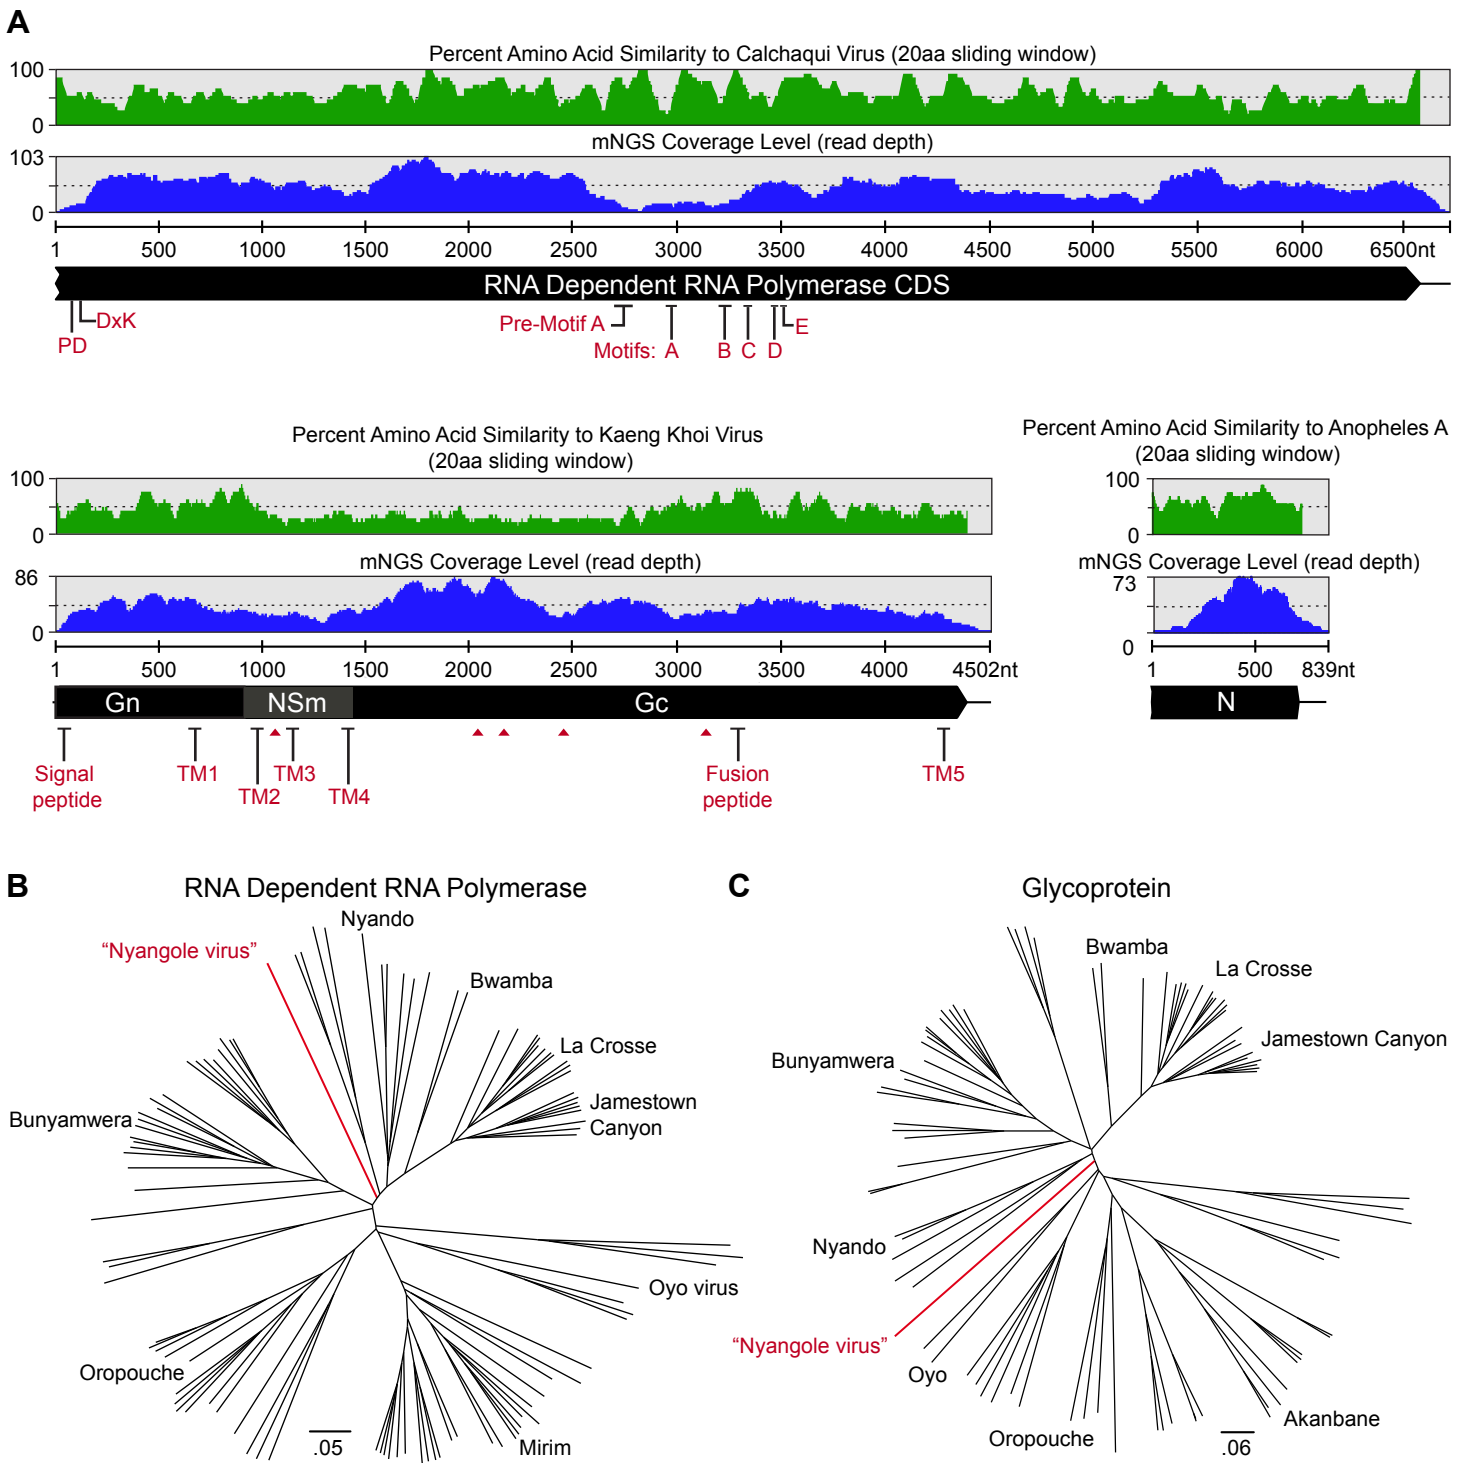

Figure 4

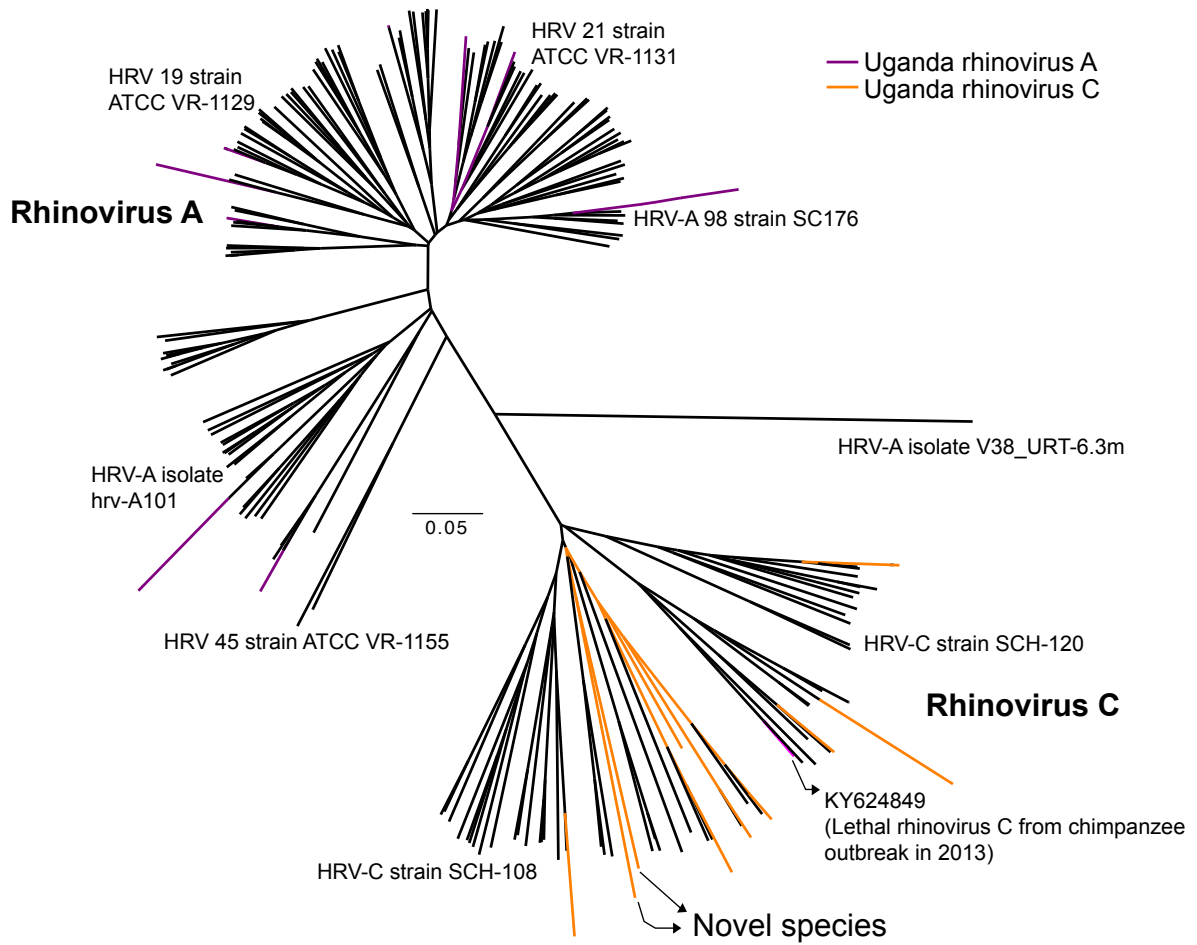

Figure S1

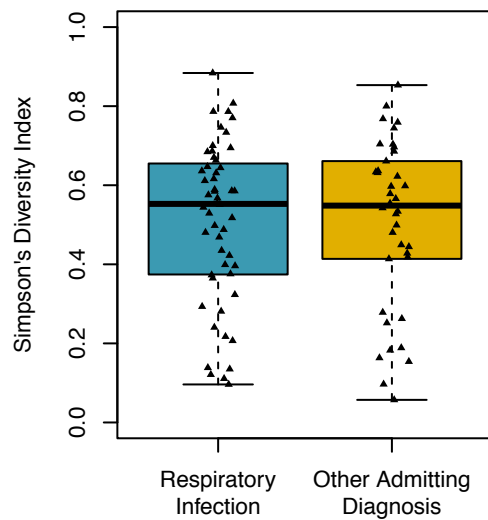



Figure S2

A

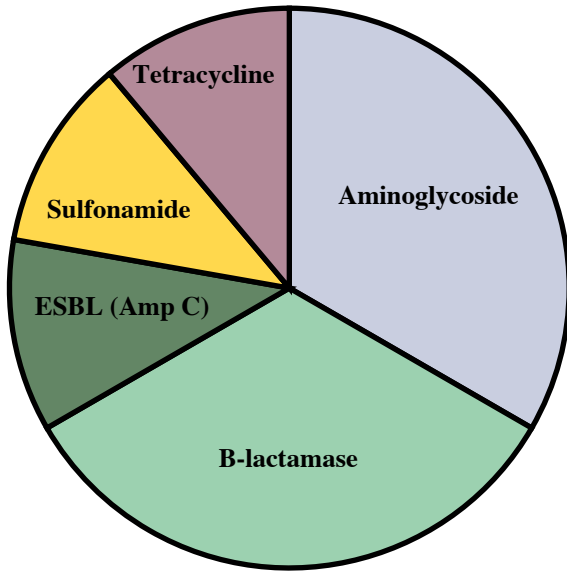

| Category       | AMR gene | Number |
|----------------|----------|--------|
| Aminoglycoside | StrA     | 3      |
| B-lactamase    | TEM-1D   | 3      |
| ESBL           | AmpC1    | 1      |
| Sulfonamide    | SulII    | 1      |
| Tetracycline   | TetO     | 1      |

B

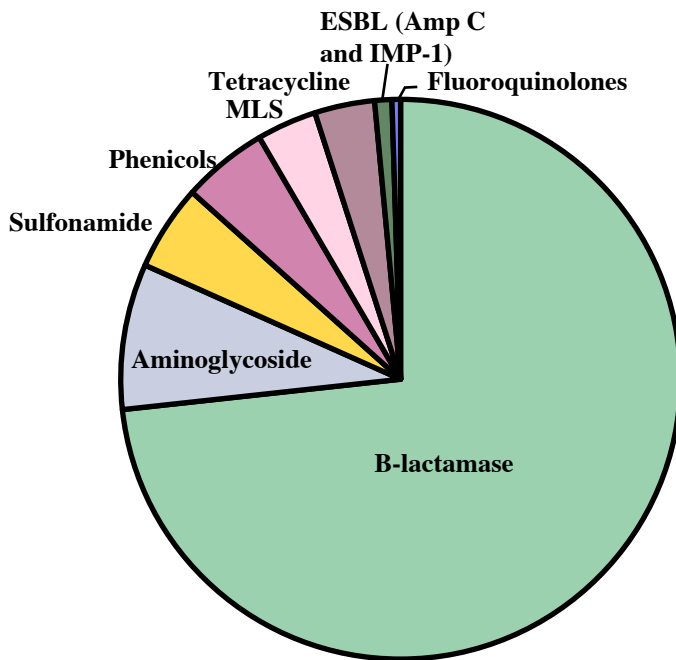

| Category         | AMR gene   | Number |
|------------------|------------|--------|
| Aminoglycoside   | StrA       | 8      |
| Aminoglycoside   | APH(3')-Ia | 4      |
| Aminoglycoside   | StrB       | 3      |
| Aminoglycoside   | APH-Stph   | 1      |
| Aminoglycoside   | AacAad     | 1      |
| B-lactamase      | BRO        | 49     |
| B-lactamase      | PBP1b      | 46     |
| B-lactamase      | PBP1a      | 41     |
| B-lactamase      | TEM-1D     | 9      |
| B-lactamase      | CfxA       | 2      |
| ESBL             | AmpC1      | 1      |
| ESBL             | IMP-1      | 1      |
| Fluoroquinolones | NorA       | 1      |
| MLS              | ErmX       | 4      |
| MLS              | MsrD       | 2      |
| MLS              | MphC       | 1      |
| Phenicols        | Cmr        | 4      |
| Phenicols        | CatA2      | 3      |
| Phenicols        | CatA9      | 1      |
| Phenicols        | CatBx      | 1      |
| Sulfonamide      | SulI       | 5      |
| Sulfonamide      | SulII      | 5      |
| Tetracycline     | TetB       | 3      |
| Tetracycline     | Tet-38     | 1      |
| Tetracycline     | TetC       | 1      |
| Tetracycline     | TetK       | 1      |
| Tetracycline     | TetM       | 1      |



Figure S3b

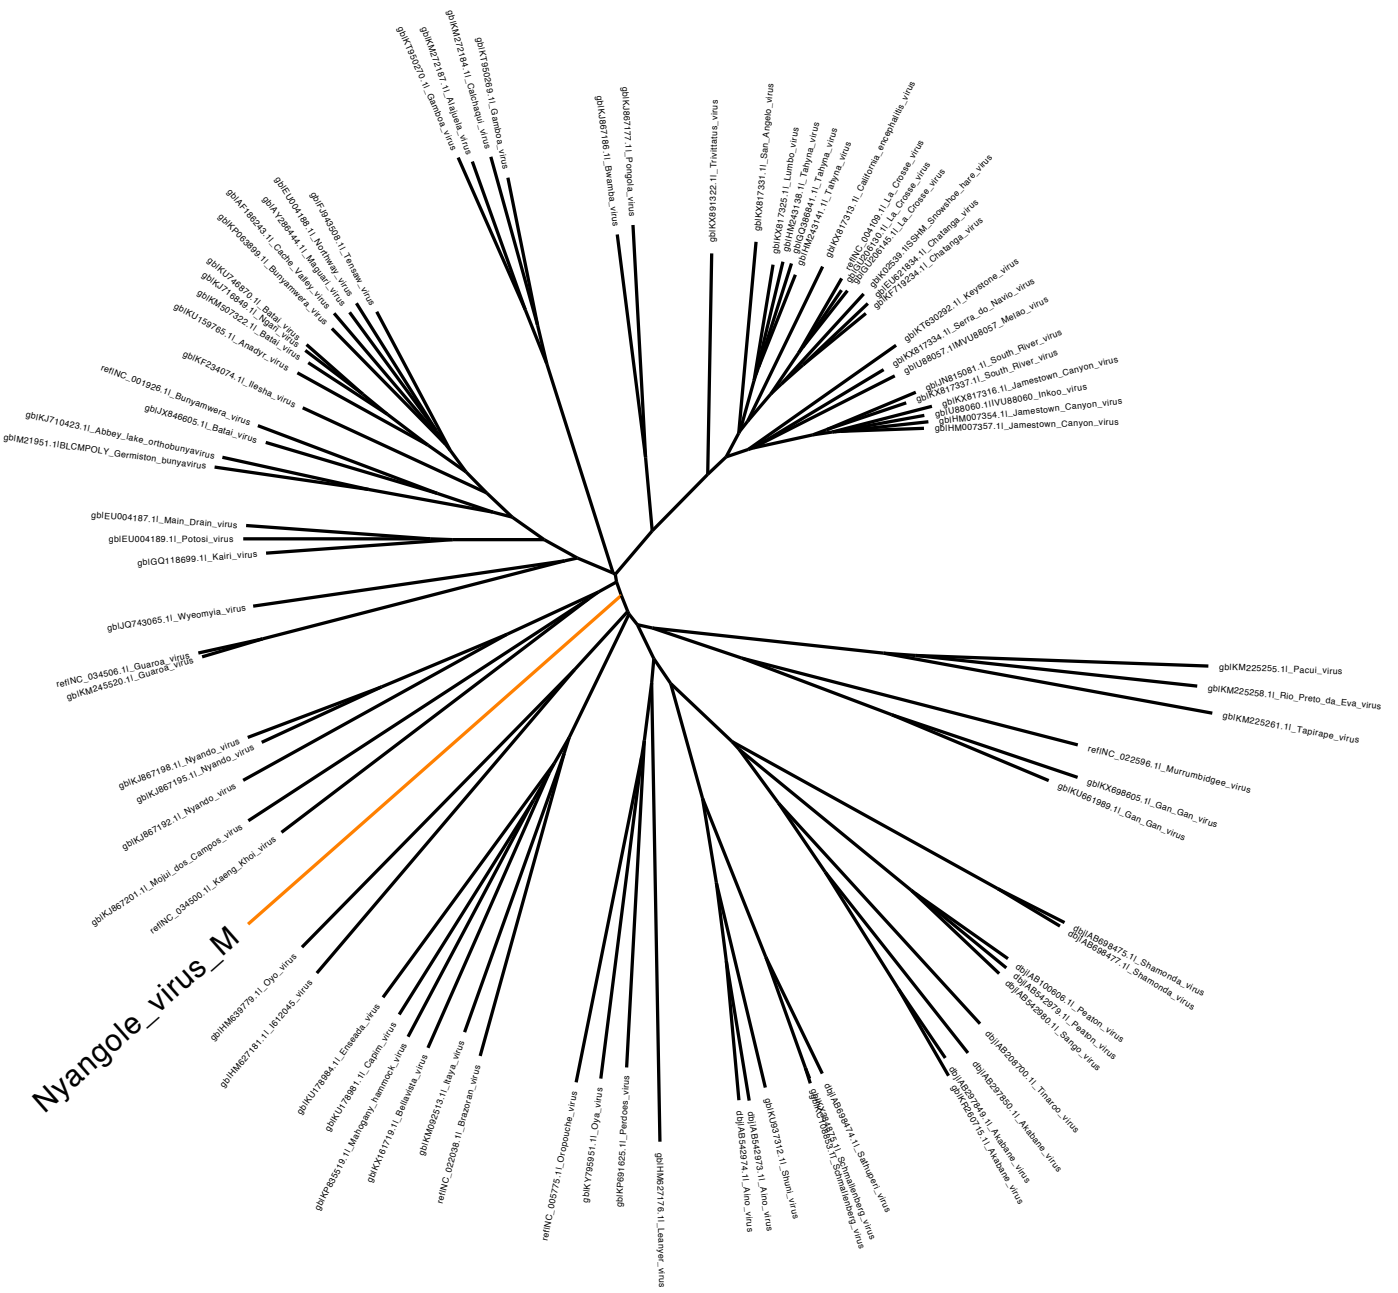

0.06

Figure S3c

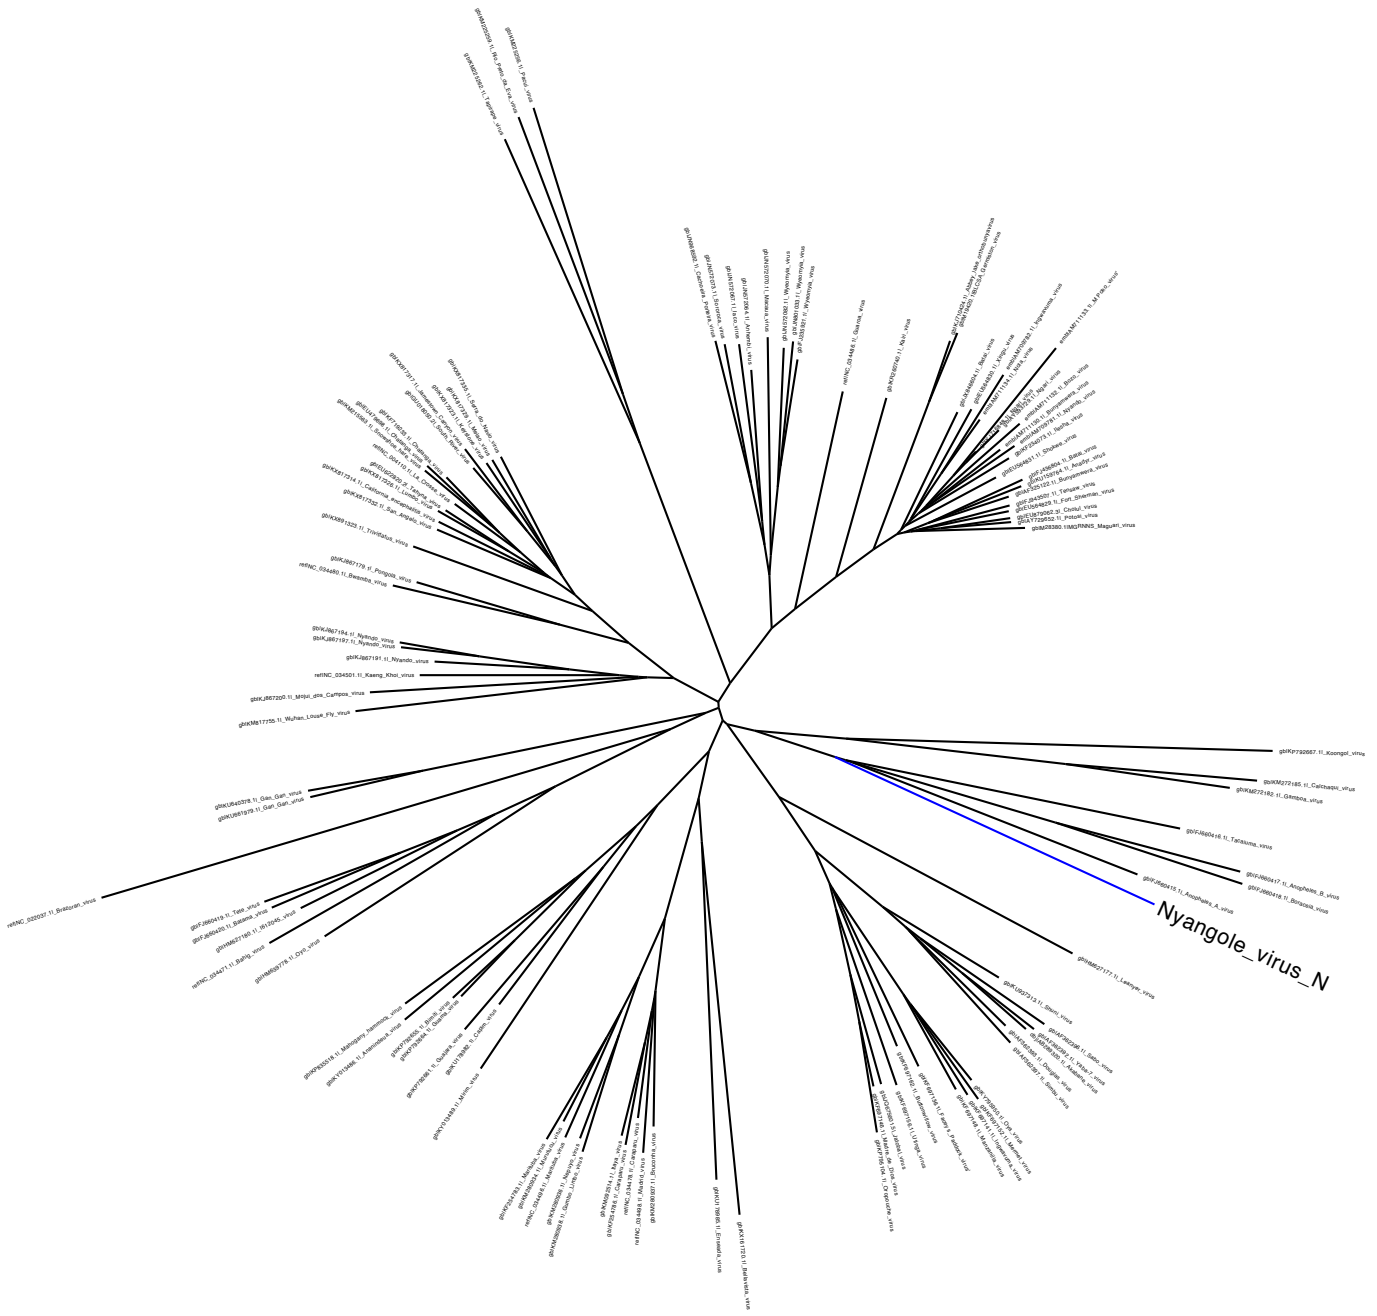

0.07
